# Supplementary material for: The Rheology and Textural Properties of Bakery Products Upcycling Brewers’ Spent Grain
Source: MDPI journal article supplement (doi:10.3390/foods12193524), 2023-09-22
Supplement: s1 [file s1]

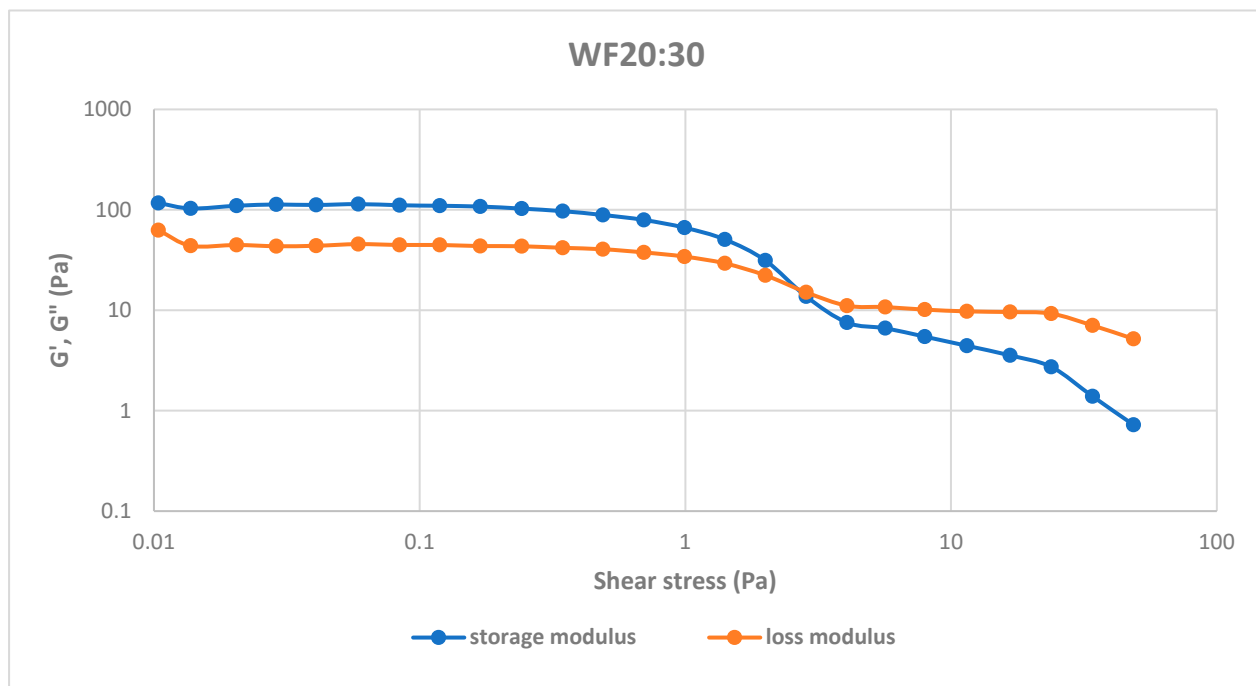

Figure S1a: Representative plots used for the amplitude assay of WF20:30 (= 20g wheat flour + 30g water)

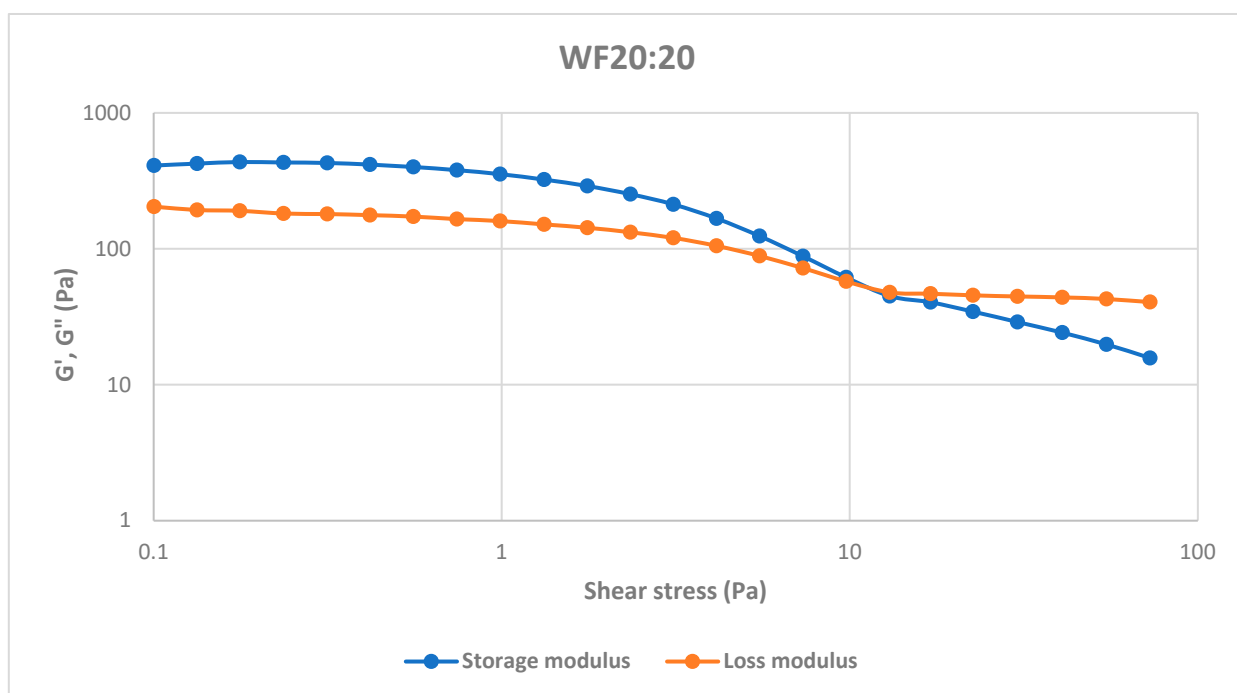

Figure S1b: Representative plot used for the amplitude assay of WF20:20 (= 20g wheat flour + 20g water)

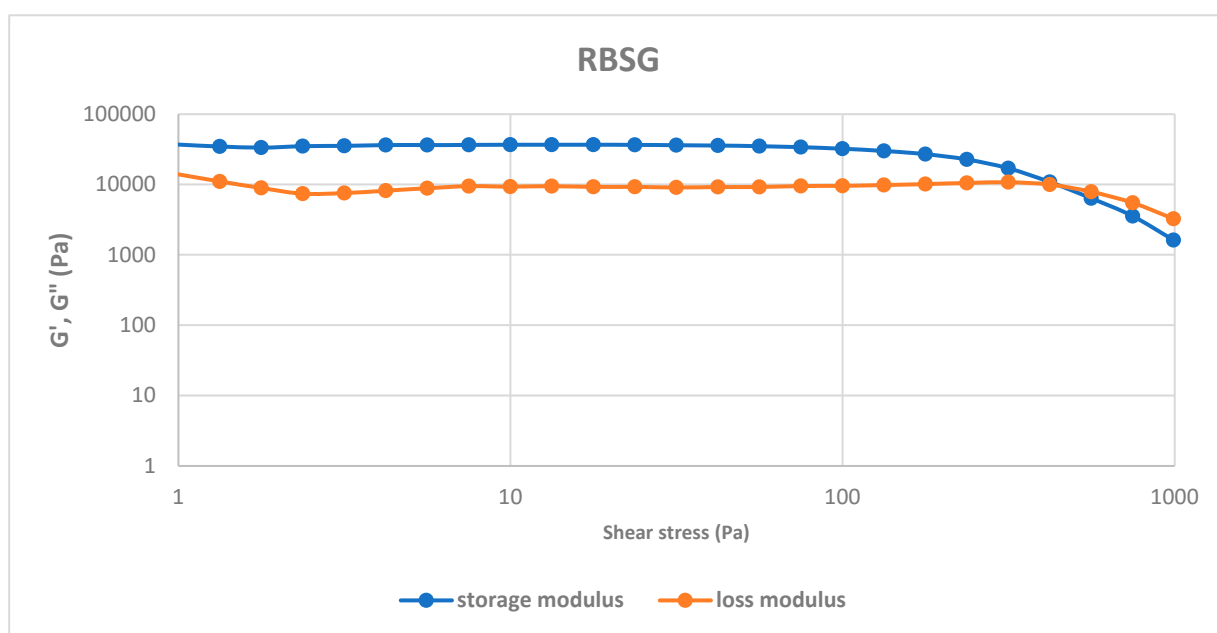

Figure S1c: Representative plot used for the amplitude assay of RBSG (= 20g rye based BSG flour + 30g water)

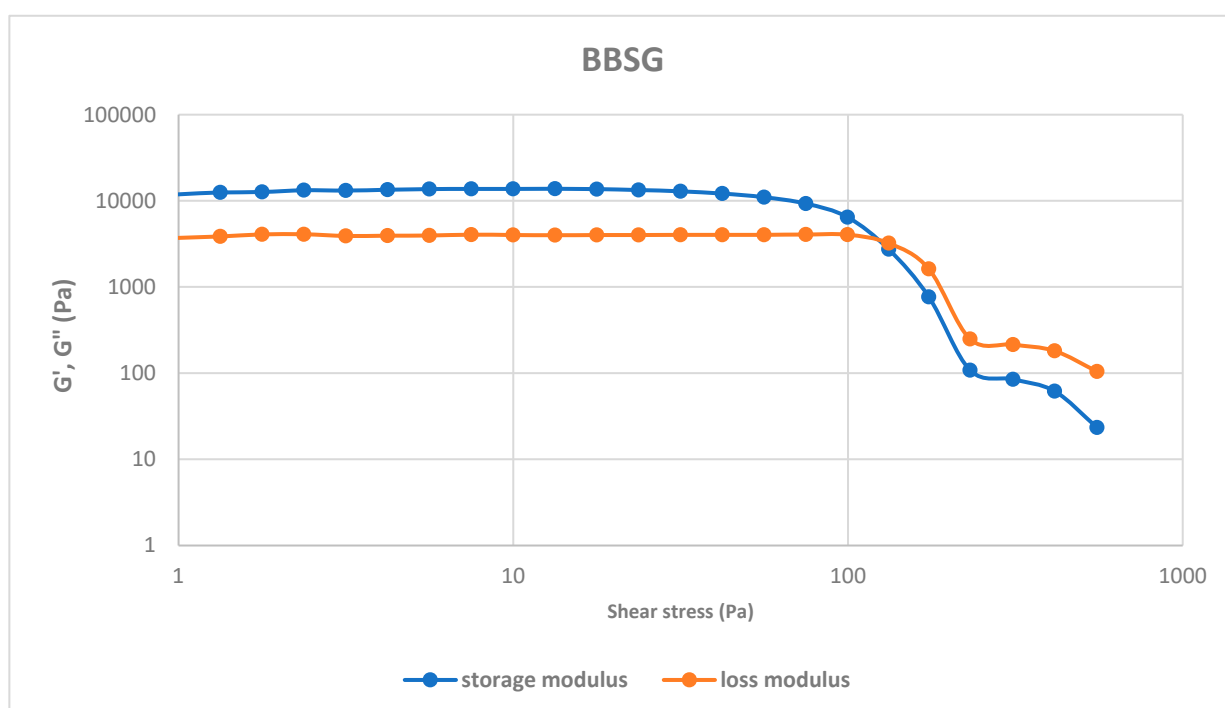

Figure S1d: Representative plot used for the amplitude assay of BBSG (= 20g barely based BSG flour + 30g water)

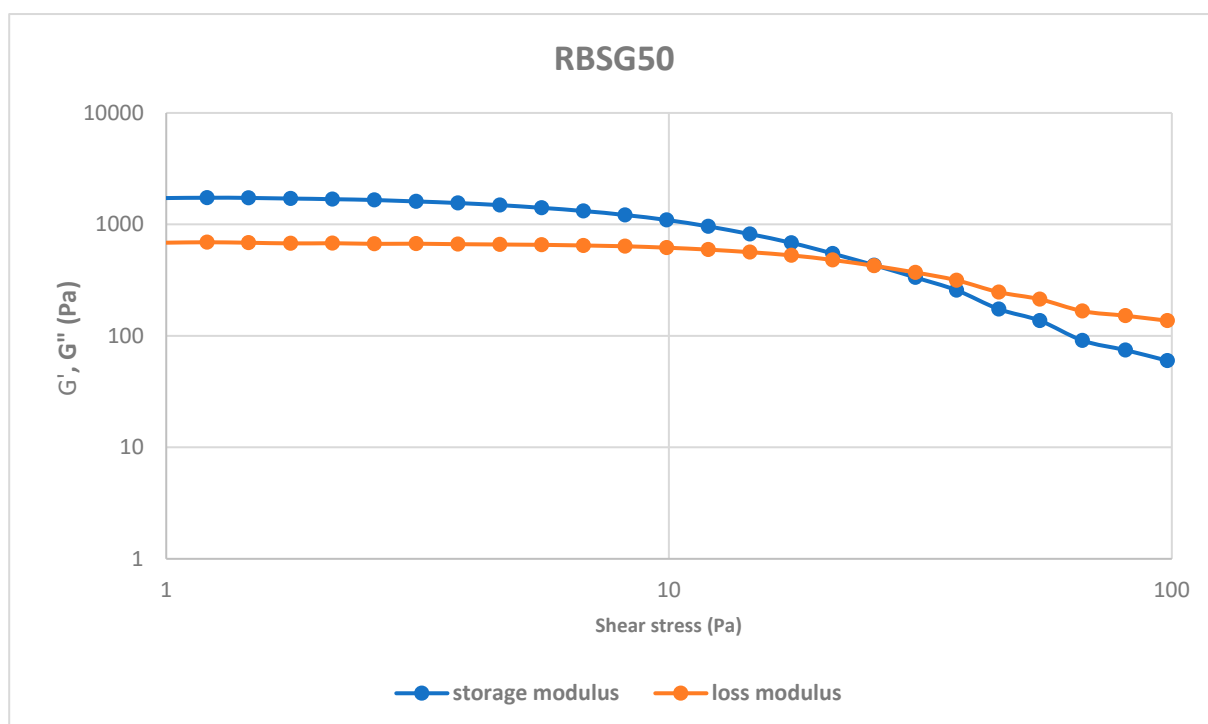

Figure S1e: Representative plot used for the amplitude assay of RBSG50 (= 10g wheat flour + 10g rye based BSG flour + 30 g water)

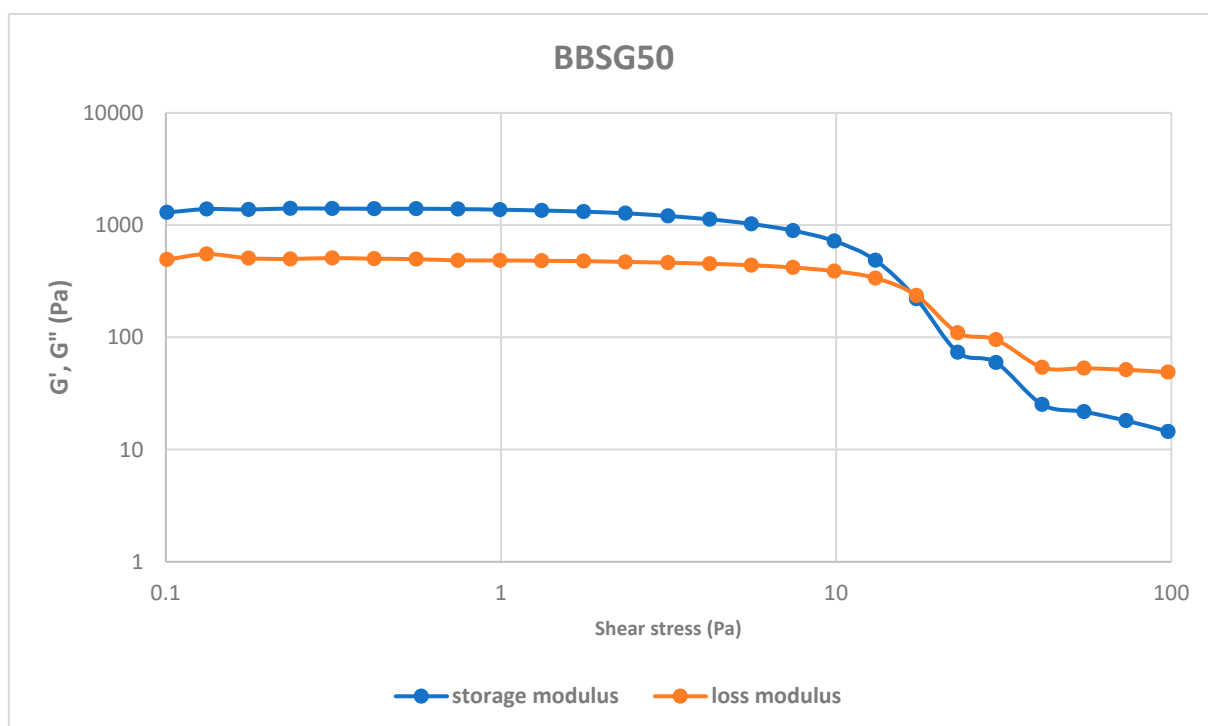

Figure S1f: Representative plot used for the amplitude assay of BBSG50 (= 10g wheat flour + 10g barley BSG flour + 30 g water).

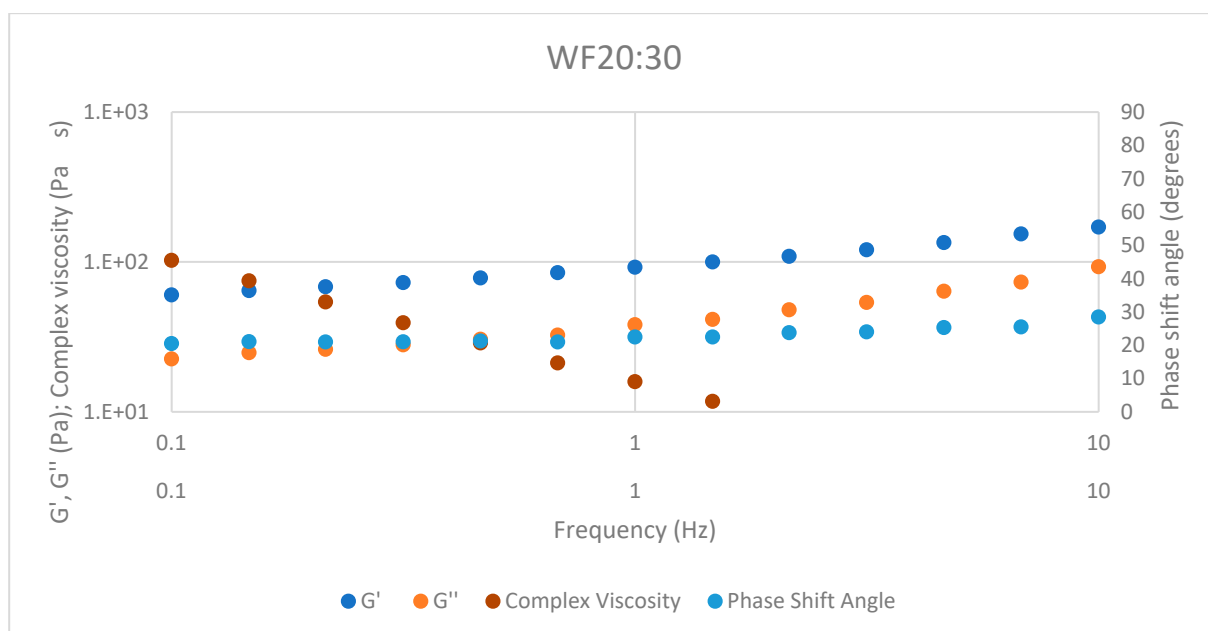

Figure S2a: Representative mechanical spectra of frequency sweep of WF20:30 (= 20g wheat flour + 30g water)

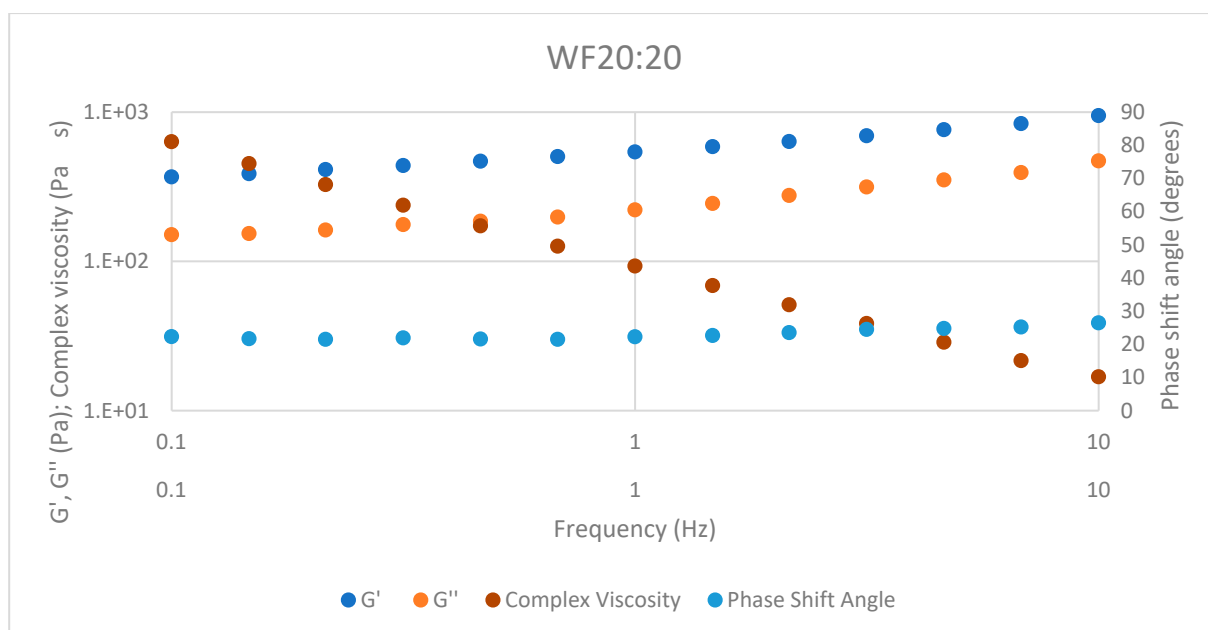

Figure S2b Representative mechanical spectra of frequency sweep of WF20:20 (= 20g wheat flour + 20g water)

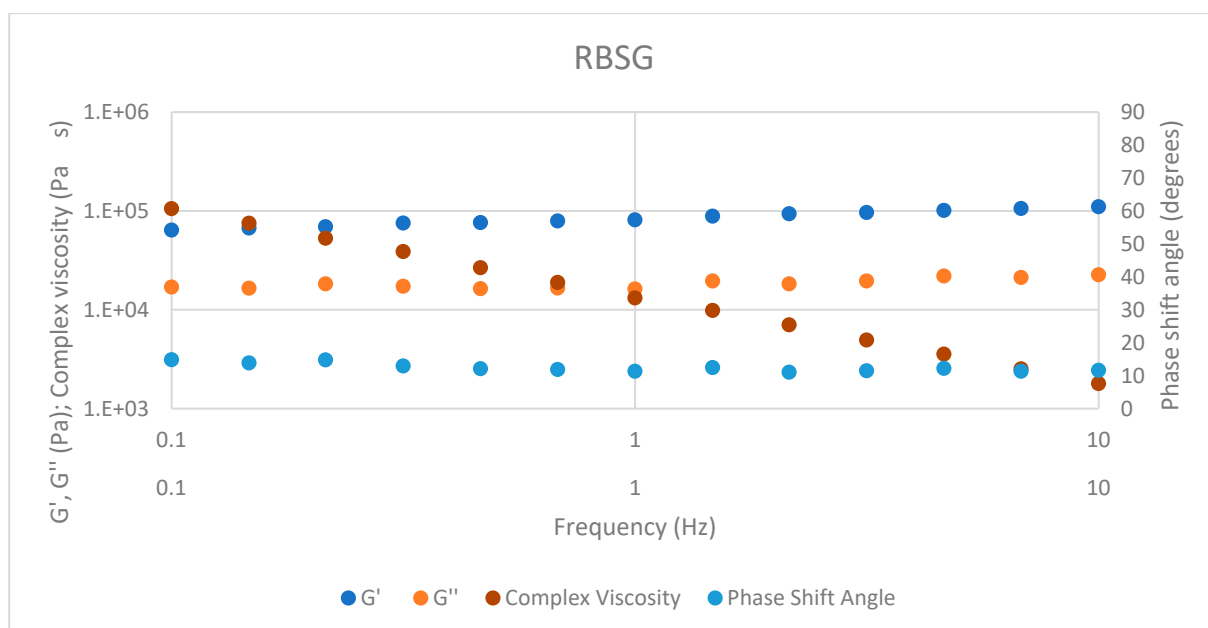

Figure S2c: Representative mechanical spectra of frequency sweep of RBSG (= 20g rye based BSG flour + 30g water)

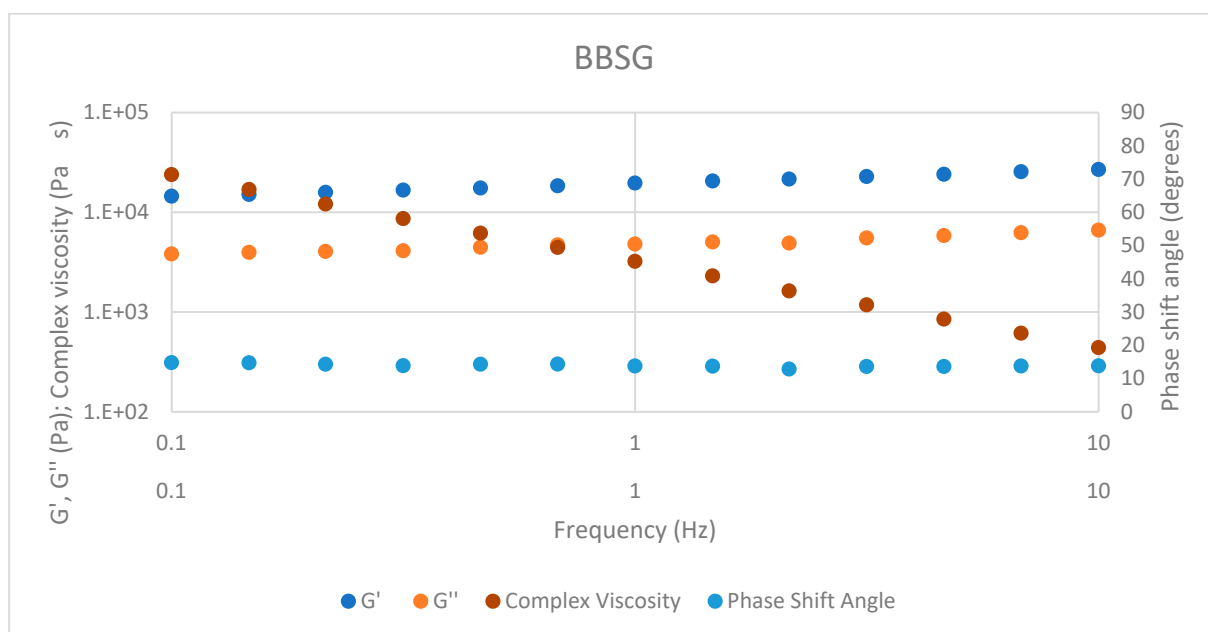

Figure S2d: Representative mechanical spectra of frequency sweep of (= 20g barely based BSG flour + 30g water)

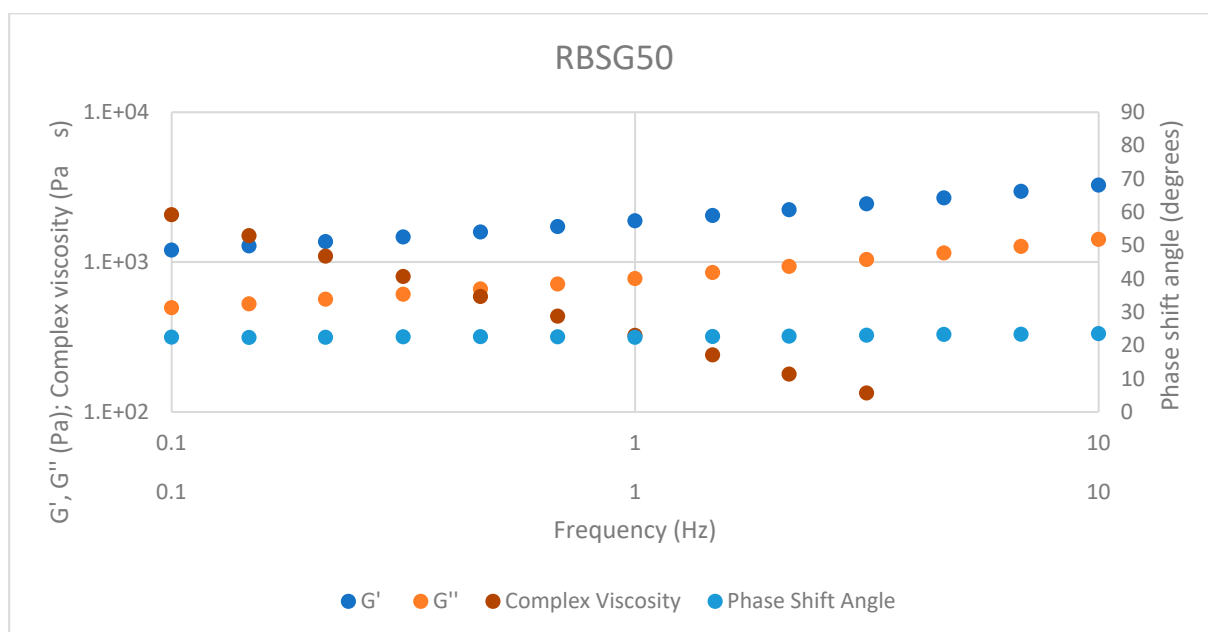

Figure S2e: Representative mechanical spectra of frequency sweep of RBSG50 (= 10g wheat flour + 10g rye based BSG flour + 30 g water)

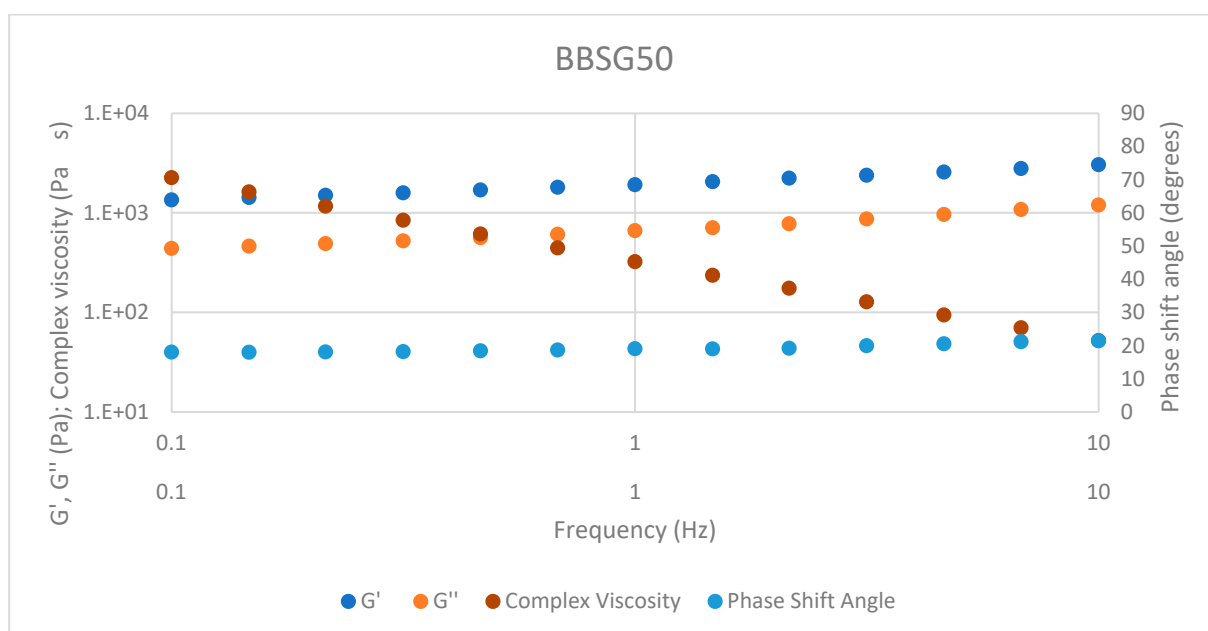

Figure S2f: Representative mechanical spectra of frequency sweep of BBSG50 (= 10g wheat flour + 10g barley BSG flour + 30 g water).
